# Supplementary material for: Advancing the development of Deep Learning and Machine Learning models for oral drugs through diverse descriptor classes: A focus on Pharmacokinetic Parameters (Vdss and PPB)
Source: Research Square preprint supplement (doi:10.21203/rs.3.rs-5233119/v1), 2025-01-01
Supplement: Supplementary file 1 [file Supplementary Table-S3.docx]

**Table S3:** The table illustrates the Boruta Selected Descriptors for Vdss and PBB and the shared descriptors for both Vdss and PPB.

| Vdss Descriptors | r_qp_PSA | MLFER_E  PPB Descriptors | MLFER_E  Shared Descriptors (Vdss ∩ PPB) |
| --- | --- | --- | --- |
|  | MLFER_BO | MLFER_L | piPC5 |
|  | MLFER_E | piPC1 | piPC6 |
|  | piPC9 | piPC2 | piPC9 |
|  | nHdsCH | piPC3 | MLFER_BO |
|  | piPC8 | piPC4 | MLFER_BH |
|  | minHdsCH | piPC5 | CrippenLogP |
|  | AATSC0i | piPC6 | TpiPC |
|  | XLogP | C2SP2 | TopoPSA |
|  | minssNH | SpMin2_Bhs |  |
|  | ETA_dEpsilon_D | piPC9 |  |
|  | minHBd | piPC10 |  |
|  | piPC7 | R_TpiPCTPC |  |
|  | AATSC0s | SpMax_D |  |
|  | AATSC2e | SpDiam_D |  |
|  | TpiPC | MLFER_BO |  |
|  | ETA_Epsilon_4 | MLFER_BH |
|  | AATS4s | MDEO-12 |
|  | ATSC2e | MDEC-23 |
|  | ATSC0i | ETA_Beta |
|  | MDEO-11 | SHother |
|  | AATS1i | r_qp_PSA |
|  | VE1_D | nwHBa |
|  | VE2_D | ETA_Eta_F |
|  | maxssNH | ETA_Eta_R_L |
|  | maxsssN | ETA_Eta_F_L |
|  | VE1_Dze | SpAD_D |
|  | AATSC1c | ECCEN |
|  | AATS4e | IC5 |
|  | AATS1e | CrippenLogP |
|  | VE3_D | ZMIC2 |
|  | maxHBd | Kier1 |
|  | TopoPSA | Kier2 |
|  | BIC2 | nAtomP |
|  | VE1_Dzv | SP-1 |
|  | MLFER_BH | CrippenMR |
|  | LogP | SpMAD_D |
|  | piPC6 | TpiPC |
|  | CrippenLogP | TopoPSA |
|  | nBondsD2 | SpMax4_Bhv |
|  | r_qp_QPlogS | SpMin2_Bhm |
|  | r_qp_QPlogPo/w | r_qp_volume |
|  | r_qp_QPlogBB | EE_D |
|  | nBondsD | nO |
|  | SHdsCH | SpAbs_Dze |
|  | BCUTc-1h | r_qp_QPpolrz |
|  | r_qp_IP (eV) | r_qp_QPlogPC16 |
|  | IC2 | r_qp_QPlogPo/w |
|  | IC1 | r_qp_QPlogS |
|  | VE1_Dzi | r_qp_CIQPlogS |
|  | r_qp_QPlogHERG | VE3_DzZ |
|  | r_qp_QPlogKhsa | r_qp_QPlogKp |
|  | SHBd | r_qp_QPlogKhsa |
|  | MATS2e | r_qp_PercentHumanOralAbsorption |
|  | TPSA | r_qp_SASA |
|  | SdssC | SpMin2_Bhv |
|  | GATS2e | r_qp_accptHB |
|  | SIC2 | SpMin2_Bhe |
|  | piPC5 | SpMin2_Bhi |
|  | nBase | XLogP |
|  | i_qp_#amine | WPATH |
|  | SssNH | TPSA |
|  | SdsCH | SpMax4_Bhi |
|  | i_qp_CNS | LogP |
|  | AMR | WTPT-4 |
|  | SssCH2 | SpMin2_Bhp |
|  | r_qp_FISA | AATS7i |
